# Supplementary figures and images for: Hydrophilic conditions: a new way for self-assembly of hybrid silica containing long alkylene chains
Source: Royal Society of Chemistry journal article supplement (doi:10.1039/b416157b), 2005-01-01

**$^{29}\text{Si}$  NMR (solid state) spectra for X1, X2 and X3**

**X1**

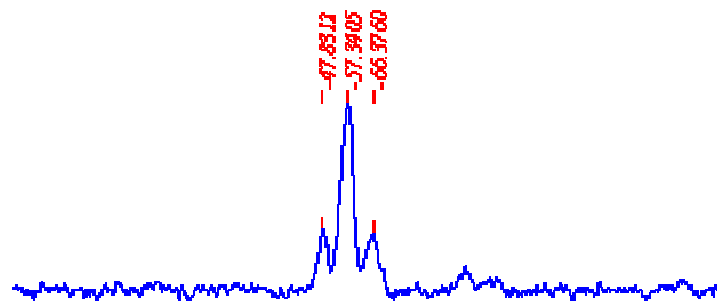

**X2**

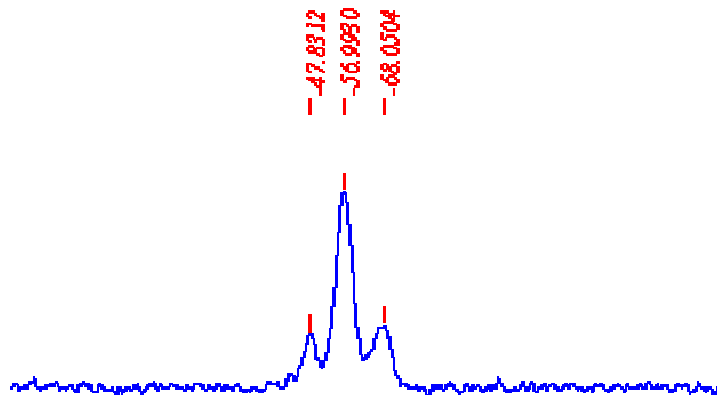

**X3**

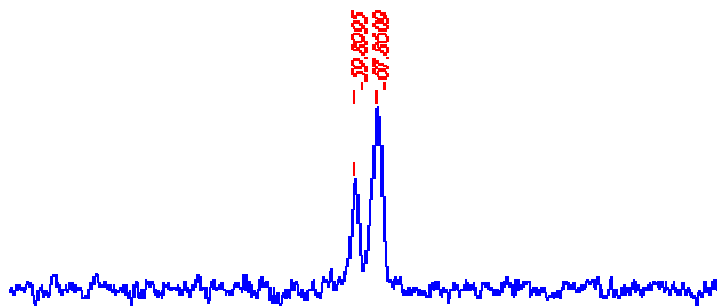

Supplement: b416157b-esi.pdf [file b416157b-esi.pdf]
